# Supplementary material for: Prevalence of metabolic syndrome and its related factors among North Korean refugees in South Korea: a cross-sectional study
Source: PubMed Central journal article supplement — BMJ Open. 2016 Jun 1;6(6):e010849. doi: 10.1136/bmjopen-2015-010849 (PMC4893935; doi:10.1136/bmjopen-2015-010849), 2016-06-01
Supplement: bmjopen-2015-010849supp_table.pdf [file bmjopen-2015-010849supp_table.pdf]

Supplementary Table 1 Demographic characteristics of NKR and a representative NKR group

|                                               | NKR<br>(n=708) |      | Representative NKR<br>(n=9,493) |      | p-value |
|-----------------------------------------------|----------------|------|---------------------------------|------|---------|
|                                               | n              | %    | n                               | %    |         |
| Sex                                           |                |      |                                 |      | 0.105   |
| Male                                          | 161            | 22.7 | 2,419                           | 25.5 |         |
| Female                                        | 547            | 77.3 | 7,074                           | 74.5 |         |
| Age distribution                              |                |      |                                 |      | 0.001   |
| 30s                                           | 281            | 39.7 | 2,608                           | 33.8 |         |
| 40s                                           | 225            | 31.8 | 3,009                           | 39.0 |         |
| 50s                                           | 101            | 14.3 | 1,063                           | 13.8 |         |
| 60s or above                                  | 102            | 14.4 | 1,035                           | 13.4 |         |
| Year of entry into South Korea                |                |      |                                 |      | 0.195   |
| Before 2002                                   | 41             | 5.9  | 470                             | 5.0  |         |
| 2002–2005                                     | 157            | 22.7 | 1,973                           | 20.8 |         |
| 2006–2008                                     | 228            | 33.0 | 3,053                           | 32.2 |         |
| 2009–2011                                     | 265            | 38.4 | 3,997                           | 42.1 |         |
| Province of origin in North Korea             |                |      |                                 |      | 0.374   |
| Hamgyeongdo                                   | 479            | 79.6 | 6,953                           | 77.5 |         |
| Pyongyang/Pyongando                           | 62             | 10.3 | 945                             | 10.5 |         |
| Others                                        | 61             | 10.1 | 1,075                           | 12.0 |         |
| Length of stay in the 3 <sup>rd</sup> country |                |      |                                 |      | 0.304   |
| < 1                                           | 230            | 37.5 | 3,570                           | 38.9 |         |
| 1–5                                           | 129            | 21.0 | 2,467                           | 26.9 |         |
| ≥5                                            | 255            | 41.5 | 3,150                           | 34.3 |         |

Data for representative NKR were drawn from a survey paper by a government institution, reference [38]
